# Supplementary material for: Guanidine-based protic ionic liquids as highly efficient intermolecular scissors for dissolving natural cellulose
Source: Royal Society of Chemistry journal article supplement (doi:10.1039/d3gc03250g), 2023-01-01
Supplement: d3gc03250g1.pdf [file d3gc03250g1.pdf]

## Electronic Supplementary Information (ESI)

For

### **Guanidine-Based Protic Ionic Liquids as High-Efficient Intermolecular Scissors for Dissolving Natural Cellulose**

Shi-Peng Chen,<sup>1</sup> Jin-Long Zhu,<sup>1</sup> Xing-Ru Chen,<sup>1</sup> Zhi-Hao Wang,<sup>1</sup> Yong-Jie Dan,<sup>1</sup> Jing Wang,<sup>1</sup> Sheng-Yang Zhou,<sup>2</sup> Gan-Ji Zhong,<sup>1</sup> Hua-Dong Huang,<sup>1,\*</sup>

Zhong-Ming Li<sup>1,\*</sup>

*<sup>1</sup>College of Polymer Science and Engineering, State Key Laboratory of Polymer Materials Engineering, Sichuan University, No. 24 South Section 1, Yihuan Road, Chengdu, 610065, China*

*<sup>2</sup>Nanotechnology and Functional Materials, Department of Materials Science and Engineering, The Ångström Laboratory, Uppsala University, 75103 Uppsala, Sweden;*

\* Corresponding to Huang, H. ([hdhuang@scu.edu.cn](mailto:hdhuang@scu.edu.cn)); Li, Z. ([zmli@scu.edu.cn](mailto:zmli@scu.edu.cn))

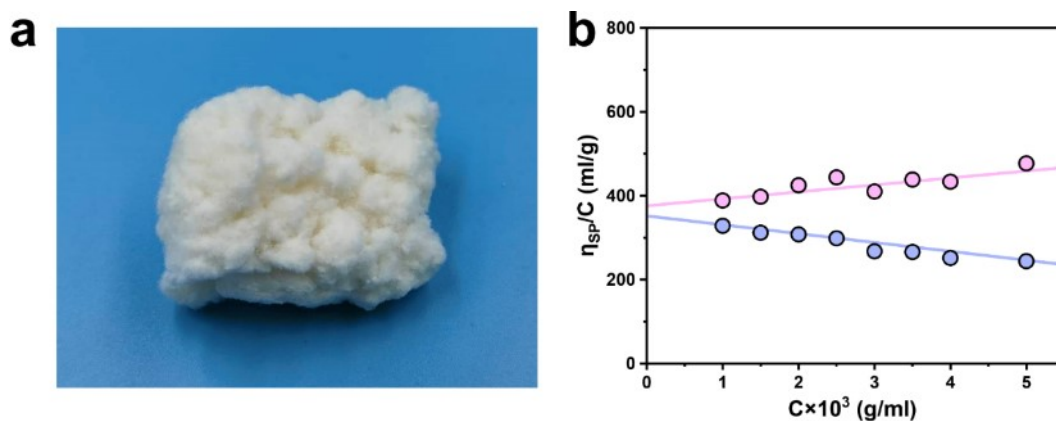

**Fig. S1** **a** The digital photograph of cotton linters. **b** Relationship between  $[\eta]$  and concentration of cotton linters in CED (0.5M; 25 °C).

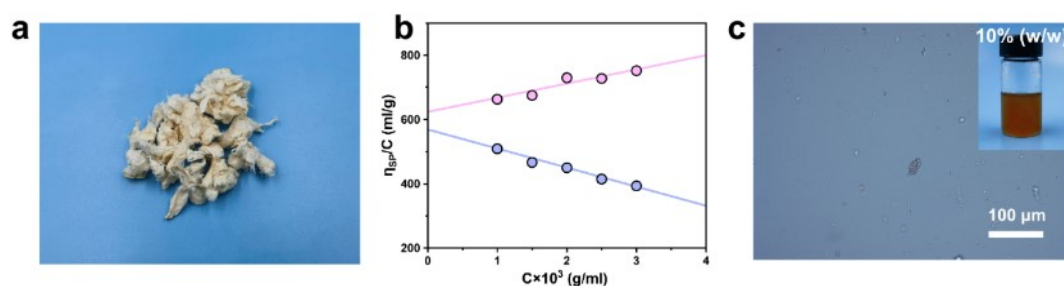

**Fig. S2** **a** The digital photograph of bark pulp. **b** Relationship between  $[\eta]$  and concentration of bark pulp in CED (0.5M; 25 °C). **c** The POM image and digital photograph of 10% (w/w) bark pulp solution with [TMGH][MAA].

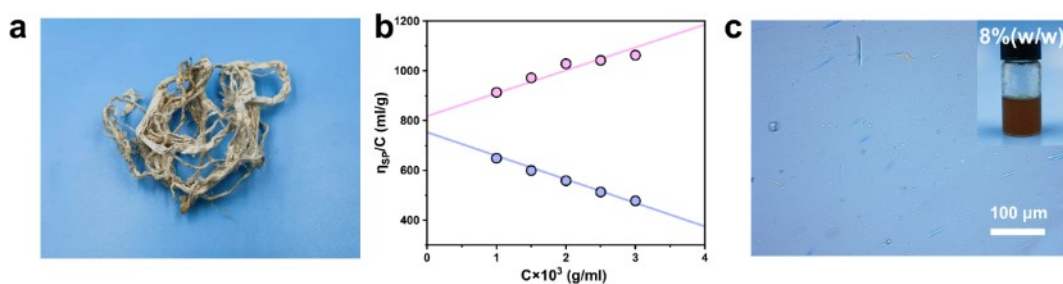

**Fig. S3** **a** The digital photograph of treated bark. **b** Relationship between  $[\eta]$  and concentration of treated bark in CED (0.5M; 25 °C). **c** The POM image and digital photograph of 8% (w/w) treated bark solution with [TMGH][MAA].

POM is used to identify the dissolution state of cellulose in solvent through the observation of cellulose fibrils and crystals. **Fig. S4a** exhibits the undissolved state of cellulose in water. Obviously, the cellulose fibrils and crystals retain the intact morphology, suggesting that water can hardly break the strong hydrogen-bonding interaction of cellulose chains. The dissolution state of 14% (w/w) cellulose in [TMGH][MAA] solvent is shown in **Fig. S4b**, it is observed clearly via the POM that part of the cellulose fibrils remains in solvent, and the diameter of residual cellulose fibrils becomes larger than that of undissolved state, indicating a greater swelling state of residual cellulose. Therefore, 14% (w/w) cellulose is able to be dissolved partially in [TMGH][MAA] solvent, beyond its limit of dissolving capacity.

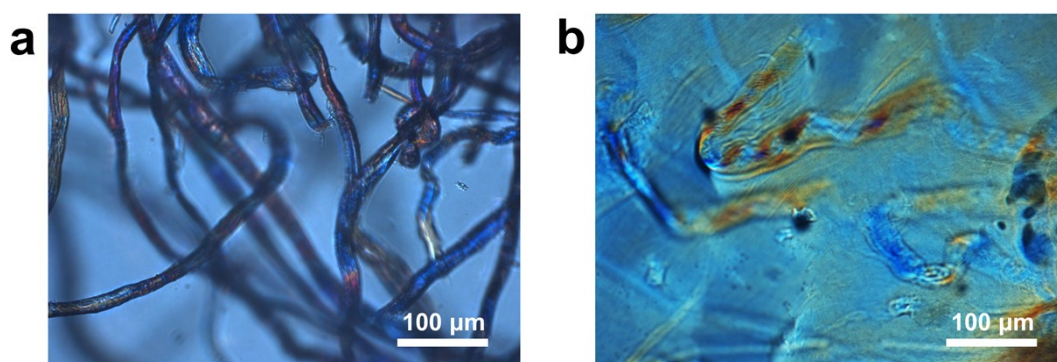

**Fig. S4** The POM photographs of the cellulose dissolved in water at room temperature (a) and 14% (w/w) cellulose dissolved in [TMGH][MAA] solvent with the molar ratio of 6:4 at 100 °C (b).

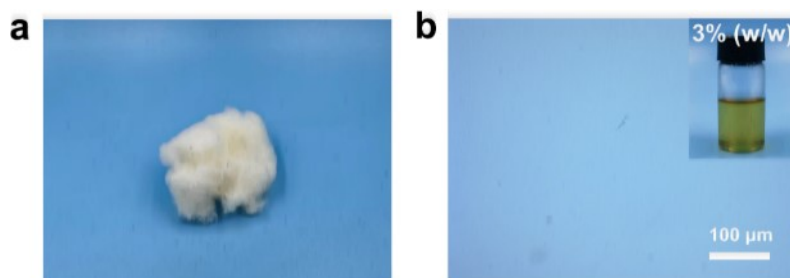

**Fig. S5** **a** The digital photograph of cotton fibers. **b** The POM image and digital photograph of 3% (w/w) cotton fibers solution with [TMGH][MAA].

**Table S1** The cellulose solubility of different solvents.

| Raw material                                        | Solvent <sup>a</sup>                                             | Temperature<br>(°C) | Solubility <sup>b</sup><br>(wt%) | Ref. |
|-----------------------------------------------------|------------------------------------------------------------------|---------------------|----------------------------------|------|
| Disintegrated<br>Cotton Linters<br>(DP=600)         | NMMO                                                             | 140                 | 25.9                             | 1    |
| Cotton Linters<br>(DP=1130)                         | LiCl/DMAc                                                        | 150                 | 13.0                             | 2    |
| Cotton Linter<br>Pulp<br>( $M_n=11.4 \times 10^4$ ) | NaOH/Urea/H <sub>2</sub> O                                       | -12                 | 4.0-5.0                          | 3    |
| Cotton Linter<br>Pulps (DP=667)                     | BzEt <sub>3</sub> NOH/H <sub>2</sub> O                           | -24                 | 10.5                             | 4    |
| MCC (DP=145)                                        | ChOH/Urea                                                        | 70                  | 9.51                             | 5    |
| Dissolved Pulp<br>(DP=650)                          | AmimCl                                                           | 80                  | 14.5                             | 6    |
| Dissolving Pulp<br>(DP=1000)                        | BmimCl                                                           | 100                 | 10.0                             | 7    |
| MCC (DP=156)                                        | [DBUH][CH <sub>3</sub> CH <sub>2</sub> O<br>CH <sub>2</sub> COO] | 80                  | 18.1                             | 8    |

|                                         |             |    |      |           |
|-----------------------------------------|-------------|----|------|-----------|
| MCC (DP=292)                            | DBN-PyO-4   | 70 | 14.1 | 9         |
| Cotton Linters<br>(DP=741)              | [TMGH][MAA] | 80 | 11.5 | This work |
| Bark pulp<br>(DP=1295)                  | [TMGH][MAA] | 80 | 9.1  | This work |
| Treated bark<br>(DP=1743)               | [TMGH][MAA] | 80 | 7.4  | This work |
| Cotton fibers<br>(DP=10,000-<br>15,000) | [TMGH][MAA] | 80 | 2.9  | This work |

<sup>a</sup> The solvents of BzEt<sub>3</sub>NOH/H<sub>2</sub>O, ChOH/Urea, [DBUH][CH<sub>3</sub>CH<sub>2</sub>OCH<sub>2</sub>COO] and DBN-PyO-4 represent Benzyltriethyl ammonium aqueous solution, choline hydroxide/urea deep eutectic solvent, 1,5-diazabicyclo[4.3.0]non-5-enium ethoxyacetate and 1,5-diazabicyclo[4.3.0]non-5-enium pyridine N-oxide, respectively.

<sup>b</sup> The cellulose solubility of solvents is expressed by the ratio of dissolved cellulose mass to the total mass of dissolved cellulose and solvents.

**Table S2** The  $^{13}\text{C}$ -NMR Chemical Shifts of Pure [TMGH][MAA] Solvent and Cellulose Solution (5:5, TMG/MAA molar ratio) at Room Temperature.

| Sample                | $\delta(\text{ppm})$ |        |       |       |        |
|-----------------------|----------------------|--------|-------|-------|--------|
|                       | I-C                  | II-C   | III-C | IV-C  | V-C    |
| [TMGH][MAA]           | 39.72                | 162.14 | 57.87 | 72.91 | 172.76 |
| Cellulose-[TMGH][MAA] | 39.73                | 161.86 | 57.94 | 72.66 | 173.10 |
| $\Delta\delta$        | +0.01                | -0.28  | +0.07 | -0.25 | +0.34  |

**Table S3** The  $^{13}\text{C}$ -NMR Chemical Shifts of Pure [TMGH][MAA] Solvent and Cellobiose Solution (5:5, TMG/MAA molar ratio) at Room Temperature.

| Sample                 | $\delta(\text{ppm})$ |        |       |       |        |
|------------------------|----------------------|--------|-------|-------|--------|
|                        | I-C                  | II-C   | III-C | IV-C  | V-C    |
| [TMGH][MAA]            | 39.73                | 162.14 | 57.87 | 72.92 | 172.73 |
| Cellobiose-[TMGH][MAA] | 39.74                | 161.92 | 57.95 | 72.71 | 173.44 |
| $\Delta\delta$         | +0.01                | -0.22  | +0.08 | -0.21 | +0.71  |

**Table S4** The  $^{13}\text{C}$ -NMR Chemical Shifts of Pure Cellobiose and Cellobiose Solution (5:5, TMG/MAA molar ratio) at Room Temperature.

| Sample                     | $\delta(\text{ppm})$ |              |             |       |              |             |       |              |             |       |              |             |       |              |             |             |            |              |             |
|----------------------------|----------------------|--------------|-------------|-------|--------------|-------------|-------|--------------|-------------|-------|--------------|-------------|-------|--------------|-------------|-------------|------------|--------------|-------------|
|                            | C1                   | C1' $\alpha$ | C1' $\beta$ | C2    | C2' $\alpha$ | C2' $\beta$ | C3    | C3' $\alpha$ | C3' $\beta$ | C4    | C4' $\alpha$ | C4' $\beta$ | C5    | C5' $\alpha$ | C5' $\beta$ | C6 $\alpha$ | C6 $\beta$ | C6' $\alpha$ | C6' $\beta$ |
| Cellobiose                 | 103.61               | 92.47        | 97.09       | 75.49 | 72.51        | 71.86       | 76.91 | 74.94        | 73.75       | 70.27 | 81.43        | 81.17       | 77.21 | 70.48        | 75.17       | 61.47       | 61.45      | 60.99        | 60.93       |
| Cellobiose-<br>[TMGH][MAA] | 103.83               | 92.63        | 97.83       | 75.32 | 71.99        | 71.91       | 76.86 | 73.96        | 72.93       | 70.18 | 81.35        | 81.35       | 77.65 | 70.31        | 74.62       | 61.22       | 61.19      | 61.12        | 61.10       |
| $\Delta\delta$             | +0.22                | +0.16        | +0.74       | -0.17 | -0.52        | +0.05       | -0.05 | -0.98        | -0.82       | -0.09 | -0.08        | +0.18       | +0.44 | -0.17        | -0.55       | -0.25       | -0.26      | +0.13        | +0.17       |

The  $^1\text{H-NMR}$  spectroscopy of  $[\text{TMGH}][\text{MAA}]$  solvent and cellulose solution in  $[\text{TMGH}][\text{MAA}]$  at the TMG/MAA molar ratio of 5:5 is shown in **Fig. S6**. As the cellulose is dissolved in  $[\text{TMGH}][\text{MAA}]$  solvent, the proton signal of  $=\text{NH}$  becomes broader, which deduces that  $[\text{TMGH}][\text{MAA}]$  solvent has strong interaction with cellulose via hydrogen bonds. Moreover, this signal shifts downfield from 8.39 ppm to 8.45 ppm. It indicates that the proton in  $=\text{NH}$  of  $[\text{TMGH}]$  forms hydrogen bonds with the oxygen atoms in  $-\text{OH}$  of cellulose, causing the decrease of electron cloud density.

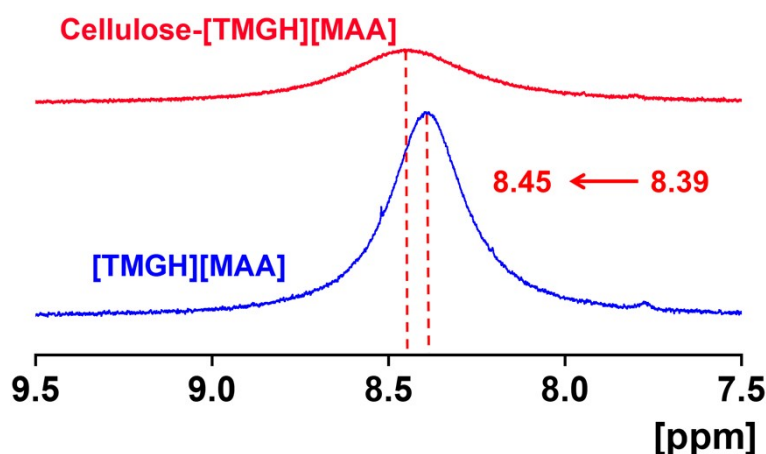

**Fig. S6**  $^1\text{H-NMR}$  spectrum of the cellulose solution in  $[\text{TMGH}][\text{MAA}]$  solvent and the corresponding pure  $[\text{TMGH}][\text{MAA}]$  solvent with TMG/MAA molar ratio of 5:5.

The  $^1\text{H-NMR}$  spectroscopy of cellobiose and cellobiose/ $[\text{TMGH}][\text{MAA}]$  solution with 5:5 TMG/MAA molar ratio is shown in **Fig. S7**. The signals in the range of 2.9 ppm–4.0 ppm belong to the backbone hydrogen atoms of cellobiose. With cellobiose dissolved in  $[\text{TMGH}][\text{MAA}]$  solvent, the peaks of  $2\beta\text{-H}$ ,  $2'\beta\text{-H}$ ,  $3\beta\text{-H}$ ,  $3'\beta\text{-H}$ ,  $6\beta\text{-H}$  and  $6'\beta\text{-H}$  shift upfield, indicating that the formation of hydrogen bonds between  $[\text{TMGH}][\text{MAA}]$  solvent and  $-\text{OH}$  of C2, C2', C3, C3', C6 and C6' in cellobiose increases the electron cloud density of the corresponding cellobiose backbone hydrogen



atoms.

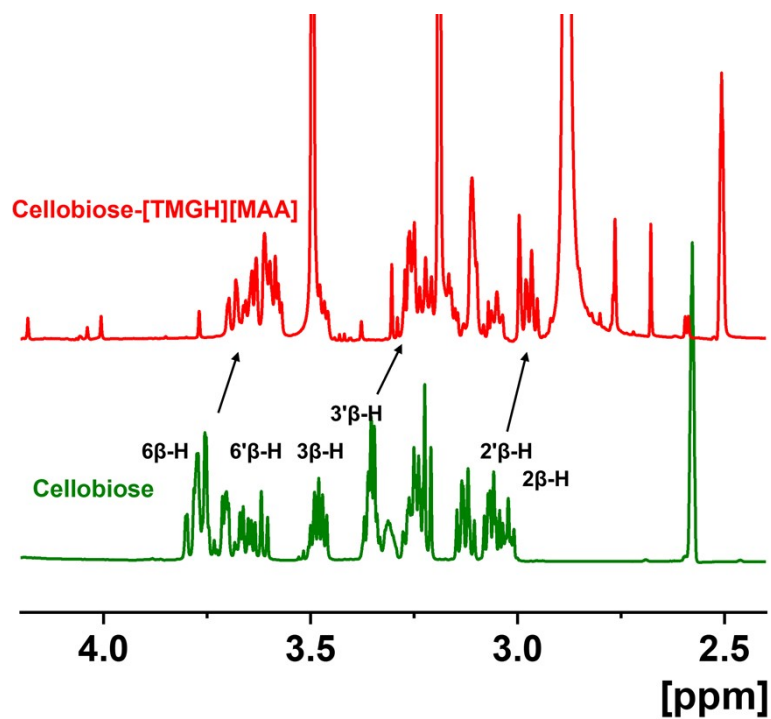

**Fig. S7** <sup>1</sup>H-NMR spectrum of pure cellobiose and the cellobiose solution in [TMGH][MAA] solvent with 5:5 TMG/MAA molar ratio.

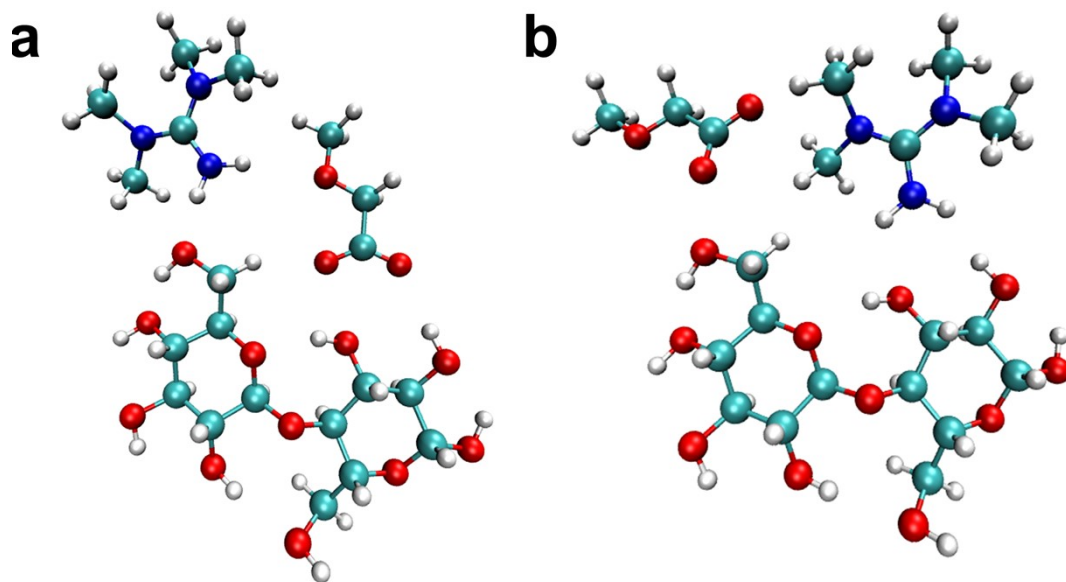

**Fig. S8** Initial structure A (a) and structure B (b) of [TMGH][MAA] and cellobiose for DFT calculation.

**Table S5** Electron Density ( $\rho_{\text{BCP}}$ ) and its Laplacian ( $\nabla^2\rho_{\text{BCP}}$ ) at the BCPs of Bonds,

Obtained by AIM Theory.

| Structure | Sort               | Bond           | $\rho(\text{bcp})$ | $\nabla^2\rho(\text{bcp})$ |
|-----------|--------------------|----------------|--------------------|----------------------------|
| A         | [MAA]-Cellobiose   | O-H $\cdots$ O | 0.03829            | 0.1155                     |
|           | [MAA]- Cellobiose  | C $\cdots$ O   | 0.00917            | 0.03727                    |
|           | [MAA]- Cellobiose  | C-H $\cdots$ O | 0.00184            | 0.006069                   |
|           | [TMGH]- Cellobiose | N-H $\cdots$ O | 0.02510            | 0.09788                    |
|           | [TMGH]-[MAA]       | N-H $\cdots$ O | 0.03342            | 0.1166                     |
|           | [TMGH]-[MAA]       | C-H $\cdots$ O | 0.009072           | 0.03857                    |
|           | [TMGH]-[MAA]       | C-H $\cdots$ O | 0.006193           | 0.02189                    |
|           | [TMGH]-[MAA]       | C-H $\cdots$ O | 0.007324           | 0.02604                    |
| B         | [TMGH]- Cellobiose | N-H $\cdots$ O | 0.005183           | 0.02204                    |
|           | [TMGH]- Cellobiose | N-H $\cdots$ O | 0.03177            | 0.1133                     |
|           | [TMGH]- Cellobiose | C-H $\cdots$ O | 0.005516           | 0.02183                    |
|           | [TMGH]-[MAA]       | C-H $\cdots$ O | 0.01027            | 0.03770                    |
|           | [TMGH]-[MAA]       | C-H $\cdots$ O | 0.005873           | 0.01955                    |
|           | [TMGH]-[MAA]       | C-H $\cdots$ O | 0.01138            | 0.04159                    |

The conductivity of the mixture of [TMGH][MAA] solvent and 1 wt% water is shown in **Fig. S9a**, and the shape of curve surface is consistent with that of pure solvent in **Fig. S3a**. The conductivity increases with the increase of temperature. In addition, as the TMG/MAA molar ratio increases, the conductivity first increases and then decreases beyond the TMG/MAA molar ratio of 7:3. **Fig. S9b** presents the viscosity of the

mixture of [TMGH][MAA] solvent and 1 wt% water from 30 °C to 100 °C. As expected, the viscosity decreases with the increased temperature.

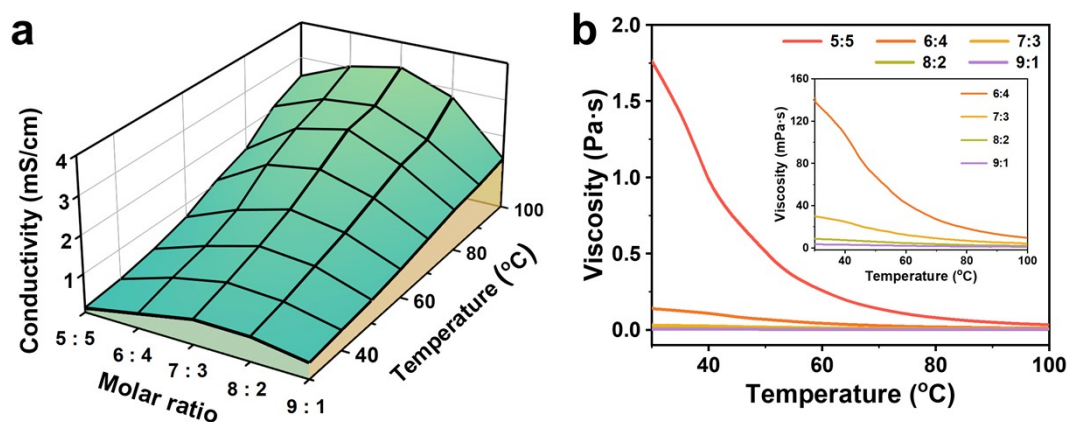

**Fig. S9 a** The effect of temperature on electrical conductivity of the mixture of the [TMGH][MAA] solvent and 1 wt% water. **b** Viscosity of the mixture of [TMGH][MAA] solvent with various TMG/MAA molar ratios and 1 wt% water as a function of temperature from 30 °C to 100 °C. The inset shows the partial enlarged viscosity curves of the mixture with the TMG/MAA molar ratios from 6:4 to 9:1.

The viscosity-shearing rate curves of [TMGH][MAA] solvent and 5% (w/w) cellulose solution with various TMG/MAA molar ratios are shown in **Fig. S10**. As shown in **Fig. S10a**, the viscosity of [TMGH][MAA] solvent remains constant with the increase of shearing rate, exhibiting a characteristic of Newtonian fluids. When the TMG/MAA molar ratio increases to 7:3, the viscosity of [TMGH][MAA] solvent is obtained to be a particularly lower value of 67.3 mPa·s compared to imidazolium-based ILs (AmimCl: 685 mPa·s at 30 °C;<sup>6</sup> BmimCl: 11000 mPa·s at 30 °C<sup>10</sup>), which shows better fluidity and is more favor of cellulose dissolution. In **Fig. S10b**, the viscosity of cellulose solution decreases with increased shearing rate, exhibiting a feature of non-Newtonian

fluids. It suggests that cellulose is dissolved effectively into [TMGH][MAA] solvent. With the same tendency as that of solvent, the viscosity of cellulose solution decreases with the increase of TMG/MAA molar ratio. Due to the weak cellulose dissolution capacity of [TMGH][MAA] solvent with 9:1 molar ratio, the viscosity of corresponding 5% (w/w) cellulose solution could not be measured. In addition, at a low shear rate, the viscosity of 5% (w/w) cellulose solution with the TMG/MAA molar ratio of 7:3 is in the range of medium viscosity fluids (5~50 Pa·s), which exhibits a good processability.

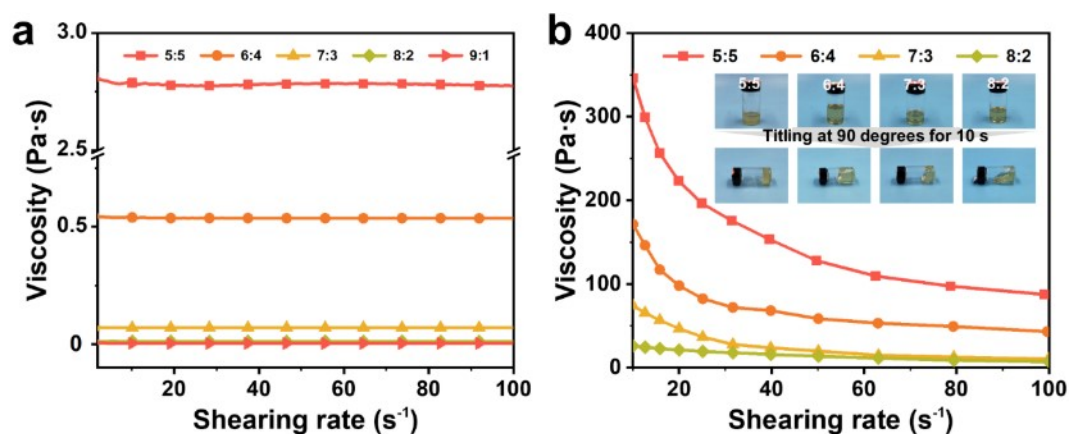

**Fig. S10** **a** Viscosity as a function of shearing rate for [TMGH][MAA] solvent. **b** Viscosity as a function of shearing rate for 5% (w/w) cellulose solution with various TMG/MAA molar ratios at room temperature, and the inset is the flowing state of cellulose solution with various TMG/MAA molar ratios after tilting at 90° for 10 s.

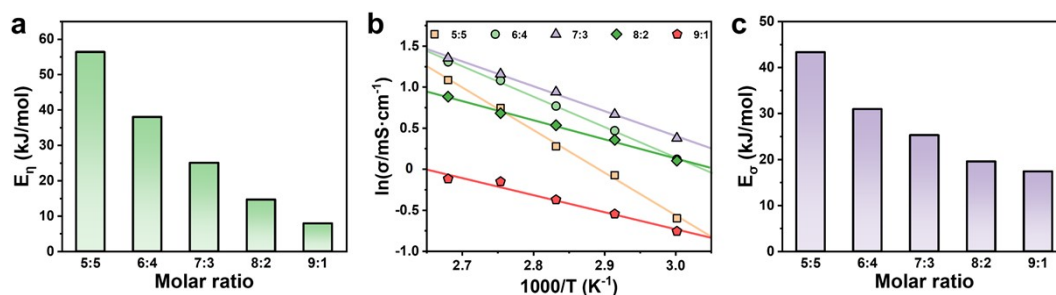

**Fig. S11** **a** Dependencies of flow activation energy ( $E_\eta$ ) on TMG/MAA molar ratio in [TMGH][MAA] solvent. **b** Arrhenius fitted lines of  $\ln\sigma$  versus  $1/T$  for [TMGH][MAA] solvent. **c** Dependencies of activation energy for electrical conduction ( $E_\sigma$ ) on TMG/MAA molar ratio in [TMGH][MAA] solvent.

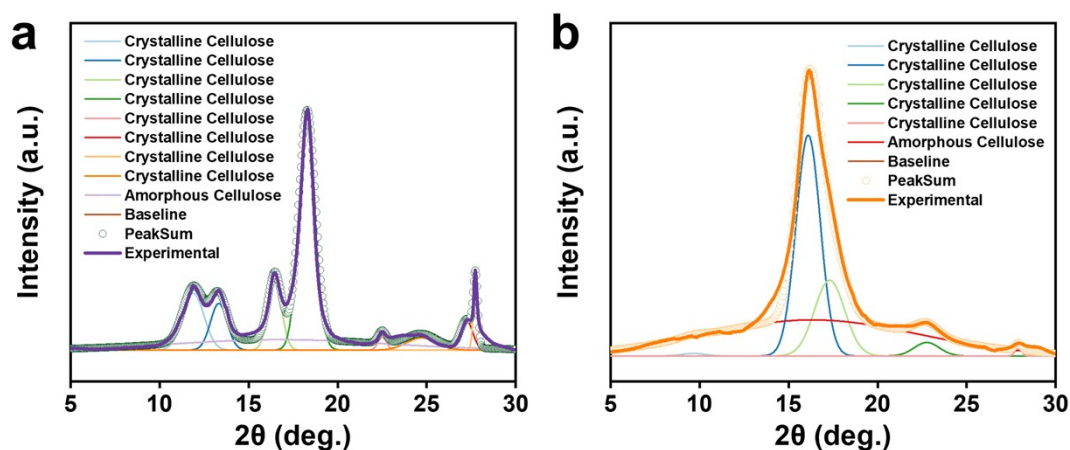

**Fig. S12** Deconvolution of WAXD patterns for original cellulose (a) and regenerated cellulose film (b).

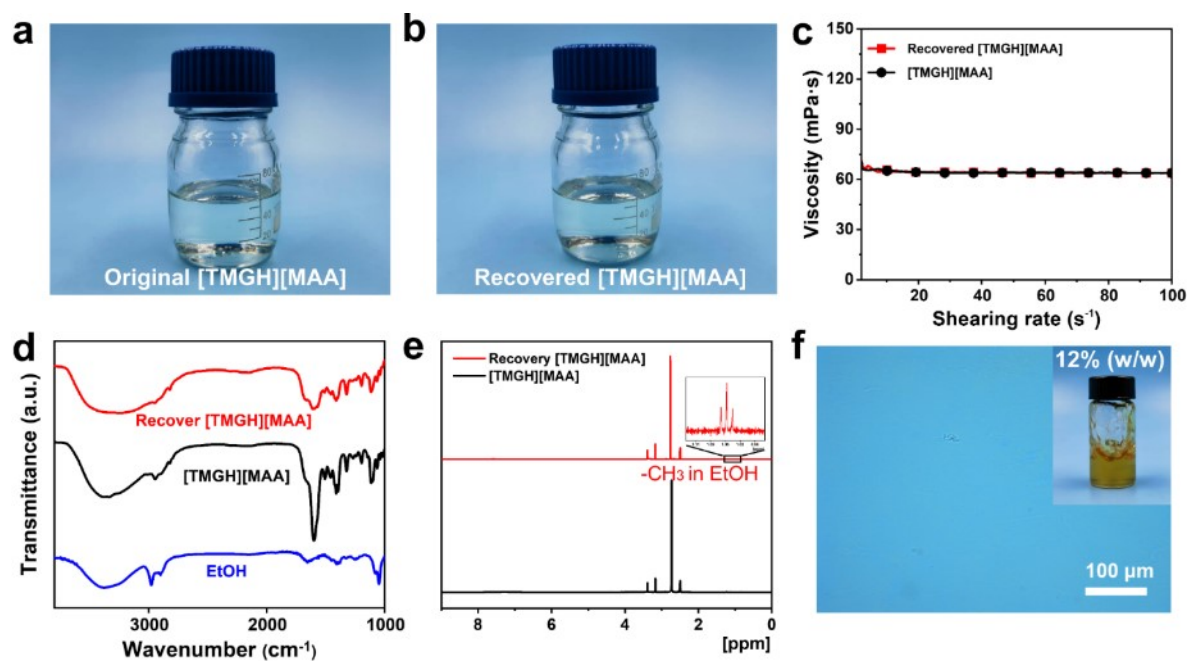

**Fig. S13** The digital photograph of original [TMGH][MAA] (a) and recovered

[TMGH][MAA] (b). c Viscosity as a function of shearing rate for original [TMGH][MAA] and recovered [TMGH][MAA]. d ATR-FTIR spectra of original [TMGH][MAA], recovered [TMGH][MAA] and EtOH. e <sup>1</sup>H-NMR spectrum of original [TMGH][MAA] and recovered [TMGH][MAA]. f The POM image and digital photograph of 12% (w/w) cotton linters solution with recovered [TMGH][MAA].

## Supplementary References

1. H. Chanzy and A. Peguy, *J. Polym. Sci. Polym. Phys. Ed.*, 1980, **18**, 1137-1144.
2. C. L. McCormick, P. A. Callais and B. H. Jr. Hutchinson, *Macromolecules*, 1985, **18**, 2394-2401.
3. J. Cai and L. Zhang, *Macromol. Biosci.*, 2005, **5**, 539-548.
4. Y. Wang, L. Liu, P. Chen, L. Zhang and A. Lu, *Phys. Chem. Chem. Phys.*, 2018, **20**, 14223-14233.
5. Y. Zhong, J. Wu, H. Kang and R. Liu, *Green Chem.*, 2022, **24**, 2464-2475.
6. H. Zhang, J. Wu, J. Zhang and J. He, *Macromolecules*, 2005, **38**, 8272-8277.
7. R. P. Swatloski, S. K. Spear, J. D. Holbrey and R. D. Rogers, *J. Am. Chem. Soc.*, 2002, **124**, 4974-4975.
8. X. Li, H. Li, Z. Ling, D. Xu, T. You, Y.-Y. Wu and F. Xu, *Macromolecules*, 2020, **53**, 3284-3295.
9. Q. Liu, H. Yu, T. Mu, Z. Xue and F. Xu, *Carbohydr. Polym.*, 2021, **272**, 118454.
10. K. R. Seddon, A. Stark and M.-J. Torres, in *Clean Solvents*, American Chemical Society, 2002, vol. 819, ch. 4, pp. 34-49.
